# Supplementary material for: Efficient perovskite solar cells fabricated by manganese cations incorporated in hybrid perovskites
Source: Royal Society of Chemistry journal article supplement (doi:10.1039/c9tc03375k), 2019-01-01
Supplement: c9tc03375k1.pdf [file c9tc03375k1.pdf]

## Supplementary Information

### Efficient perovskite solar cells fabricated by manganese cations incorporated in hybrid perovskite

Wei Liu,<sup>a</sup> Liang Chu,<sup>a,b</sup> Nanjing Liu,<sup>a</sup> Yuhui Ma,<sup>a</sup> Ruiyuan Hu,<sup>a</sup> Yakui Weng,<sup>b</sup> Hui Li,<sup>b</sup> Jian

Zhang,<sup>b</sup> Xing'ao Li,<sup>\* a, b</sup> Wei Huang<sup>\* a, c</sup>

<sup>a</sup> Key Laboratory for Organic Electronics & Information Displays (KLOEID), Synergetic Innovation Center for Organic Electronics and Information Displays (SICOEID), Institute of Advanced Materials (IAM), School of Materials Science and Engineering (SMSE), Nanjing University of Posts and Telecommunications (NUPT), Nanjing 210023, P.R. China

<sup>b</sup> New Energy Technology Engineering Laboratory of Jiangsu Province & School of Science, Nanjing University of Posts and Telecommunications (NUPT), Nanjing 210023, China

<sup>c</sup> Shaanxi Institute of Flexible Electronics, Northwestern Polytechnical University, Xi'an, 710072, P. R.China

\* Corresponding Author:

Email: iamxali@njupt.edu.cn & iamwhuang@njupt.edu.cn

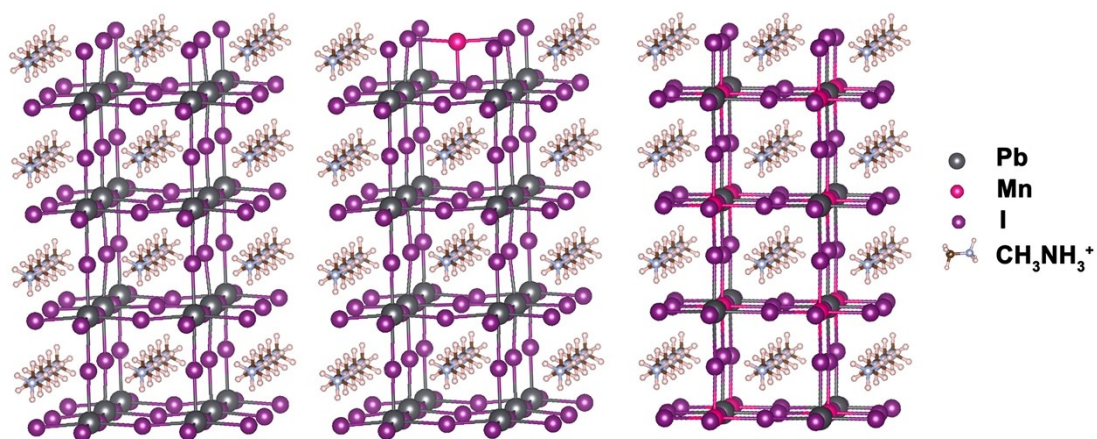

**Fig. S1:** Schematic diagram for Mn<sup>2+</sup> can easily insert into the interstices of octahedral [PbI<sub>6</sub>]<sup>4-</sup> to restrain the generating of vacancy defects.

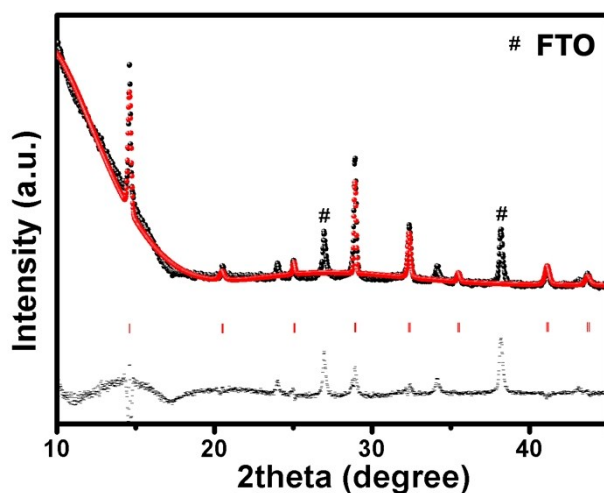

**Fig. S2:** X-ray diffraction of perovskite/FTO. Black and red line correspond to experimental data and calculation, respectively. Strips (red) indicate positions of the Bragg reflections. Deviation from the fit is shown in dark gray.

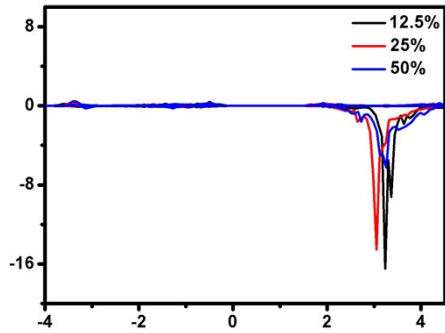

**Fig. S3.** Computed PDOS for Mn from MAPb<sub>1-x</sub>Mn<sub>x</sub>I<sub>3</sub>(where x = 12.5%, 25% , and 50%).

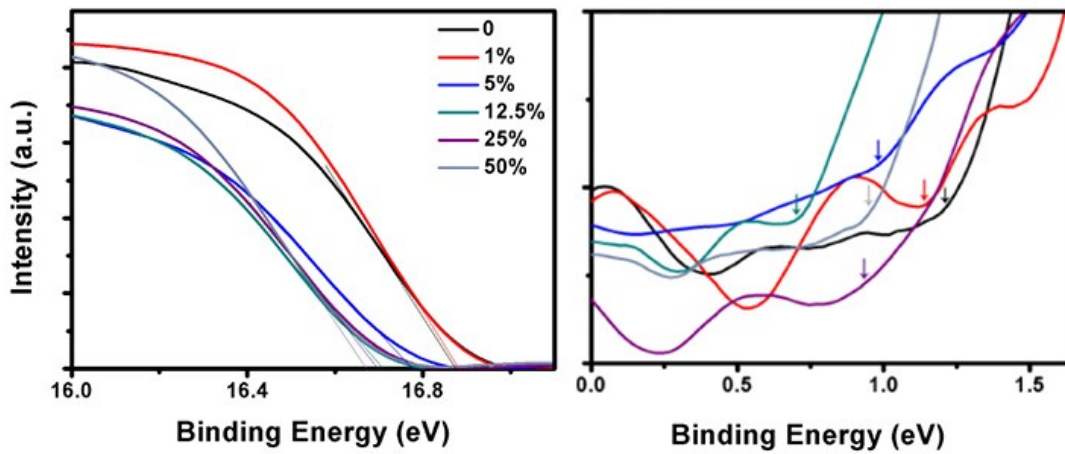

**Fig. S4.** The detail UPS of MAPb<sub>1-x</sub>Mn<sub>x</sub>I<sub>3</sub> (where x = 0, 1%, 5%, 12.5%, 25%, and 50%).

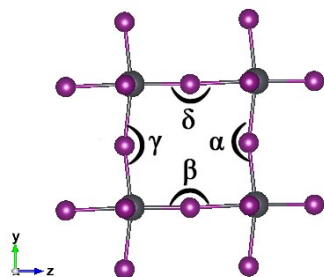

**Fig. S5.** The octahedral tilting angles of perovskite.

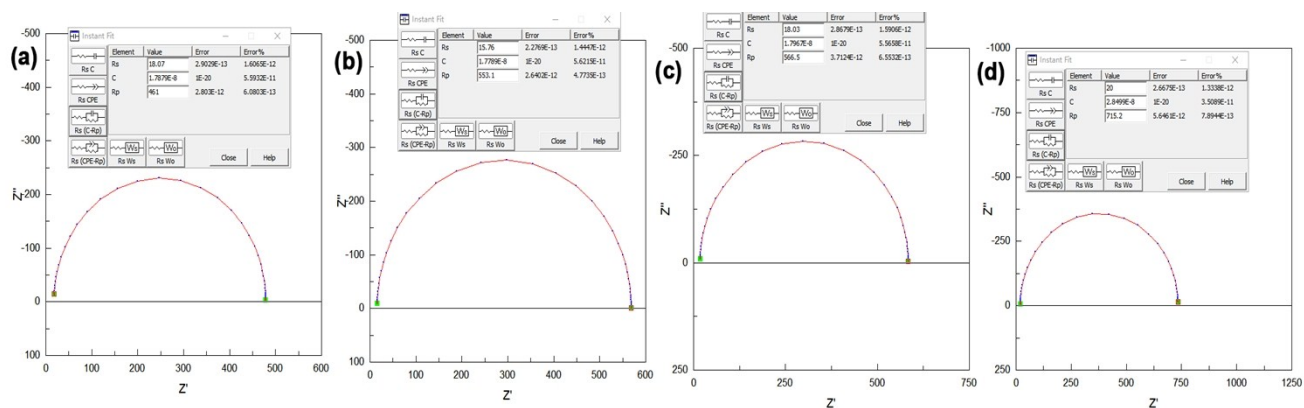

**Fig. S6.** Data-fitting result of Nyquist plots of PSCs based on (a) excessive 1% Mn-doped  $\text{MAPbI}_3$  and  $\text{MAPb}_{1-x}\text{Mn}_x\text{I}_3$  (where  $x = 0$  (b), 5% (c), and 12.5% (d)). For the data fitting Z-view program (Scribner Associates, Inc.) was used.

**Table S1** The octahedral tilting angles and bond length of  $\text{MAPb}_{1-x}\text{Mn}_x\text{I}_3$  (where  $x = 0$ , 12.5%, 25%, and 50%) ( $\alpha$ ,  $\beta$ ,  $\gamma$ ,  $\delta$  can be shown in the Fig. S5)

|              | $\alpha$ | $\beta$  | $\gamma$ | $\delta$ | Pb-I      | Mn-I      | Cell volume |
|--------------|----------|----------|----------|----------|-----------|-----------|-------------|
| 0            | 167.4164 | 168.5156 | 167.4164 | 168.5156 | 3.06-3.24 | -         | 2144.809697 |
| 0.125        | 166.4376 | 176.8819 | 167.6393 | 177.1387 | 3.05-3.40 | 2.76-3.38 | 2114.037991 |
| 0.25         | 166.7445 | 176.8288 | 166.7096 | 177.0962 | 3.02-3.38 | 2.89-3.52 | 2057.72259  |
| 0.5          | 165.8653 | 177.0558 | 165.8841 | 177.4683 | 3.07-3.32 | 2.73-3.65 | 1898.188338 |
| interstitial | 172.5254 | 177.2448 | 168.3360 | 179.0281 | 3.07-3.40 | 2.99-3.26 | 2189.87037  |

**Table S2** The calculated band gap of spin up and spin down.

| Mn-<br>incorporated | 0       | Interstitial | 12.5%   | 25%     | 50%     |
|---------------------|---------|--------------|---------|---------|---------|
| up                  | 1.677eV | 1.8191eV     | 1.819eV | 1.877eV | 1.697eV |
| down                | 1.677eV | 1.8678eV     | 1.815eV | 1.877eV | 1.697eV |

**Table S3** Fermi energy, valence and conduction band from UPS and calculation.

| Mn-doped | high<br>binding<br>energy | Fermi<br>energy<br>(eV) | low<br>binding<br>energy | valence<br>band<br>(eV) | conduction<br>band (eV) | experiment<br>band gap<br>(eV) | calculate<br>band gap<br>(eV) |
|----------|---------------------------|-------------------------|--------------------------|-------------------------|-------------------------|--------------------------------|-------------------------------|
| 0        | 16.95                     | -4.27                   | 1.22                     | -5.49                   | -3.903                  | 1.587                          | 1.677                         |
| 1%       | 16.94                     | -4.28                   | 1.13                     | -5.41                   | -3.820                  | 1.590                          | -                             |
| 5%       | 16.78                     | -4.44                   | 0.99                     | -5.43                   | -3.838                  | 1.592                          | -                             |
| 12.5%    | 16.70                     | -4.52                   | 0.71                     | -5.23                   | -3.637                  | 1.593                          | 1.816                         |
| 25%      | 16.69                     | -4.53                   | 0.92                     | -5.45                   | -3.850                  | 1.600                          | 1.877                         |
| 50%      | 16.66                     | -4.56                   | 0.93                     | -5.49                   | -3.91                   | 1.580                          | 1.697                         |
